1 ORIGINAL RESEARCH ARTICLE

2 **Acute Effects of Cigarette on Endothelial Nitric Oxide Synthase, Vascular**  
3 **Cell Adhesion Molecule 1 and Aortic Intima Media Thickness**  
4 **“Cigarette smoke–induced pro-atherogenic changes”**

5 Meity Ardiana, M.D., Ph.D.<sup>1,2</sup>, Anwar Santoso, M.D., Ph.D.<sup>3</sup>, Hanestya O.

6 Hermawan, M.D., M.Biomed.<sup>4</sup>, Ricardo A. Nugraha, M.D.<sup>2\*</sup>, Budi S. Pikir, M.D.,

7 Ph.D.<sup>2</sup>, I Gde Rurus Suryawan, M.D., Ph.D.<sup>2</sup>

8 <sup>1</sup> Medical Doctoral Program Student, Faculty of Medicine, Universitas Airlangga,  
9 Surabaya - Indonesia

10 <sup>2</sup> Department of Cardiology and Vascular Medicine, Faculty of Medicine

11 Universitas Airlangga - Dr. Soetomo General Academic Hospital, Surabaya -

12 Indonesia;

13 <sup>3</sup> Department of Cardiology and Vascular Medicine, Faculty of Medicine

14 University of Indonesia -National Cardiovascular Centre Harapan Kita Hospital,

15 Jakarta - Indonesia;

16 <sup>4</sup> Department of Biomedicine, Faculty of Medicine, Universitas Brawijaya, Malang

17 - Indonesia.

18 \* Correspondence to: Meity Ardiana, M.D., Ph.D.

19 Medical Doctoral Program Student, Faculty of Medicine, Universitas Airlangga,

20 Surabaya - Indonesia

21 Address: Jalan Mayjend Prof. Dr. Moestopo 47, Surabaya (60131) - Indonesia

22 Phone : +62-812-5980-8492

23 Email : meityardiana@fk.unair.ac.id

24

25 **Acute Effects of Cigarette on Endothelial Nitric Oxide Synthase, Vascular**  
26 **Cell Adhesion Molecule 1 and Aortic Intima Media Thickness**  
27 **“Cigarette smoke–induced pro-atherogenic changes”**

28

29 *Background.* Cigarette smoking could induce endothelial dysfunction and  
30 increase of circulating markers of inflammation by activation of monocytes. This  
31 can lead to the increased of intima media thickness (IMT) of entire blood vessel  
32 and result acceleration of atherosclerosis process. However, to our knowledge,  
33 little is known about the role of cigarette smoking in this atherosclerotic  
34 inflammatory process.

35

36 *Objective.* The aim of this study is to explore the link between cigarette smoking  
37 on endothelial nitric oxide synthase (e-NOS) and vascular cell adhesion  
38 molecule 1 (VCAM-1).

39

40 *Methods.* An experimental study with post-test only controlled group design was  
41 used in this study. We used 18 Wistar rats (*Rattus norvegicus*) randomly  
42 subdivided into 2 groups, group K (-) were given no tobacco smoking exposed,  
43 whereas group K (+) were exposed to 40 cigarettes smokes daily. After 28 days,  
44 samples were analyzed for e-NOS, VCAM-1 and aortic IMT.

45

46 *Results.* Our results indicate that tobacco smoke can enhance the expression of  
47 VCAM-1 on mouse cardiac vascular endothelial cell, resulting in decreased  
48 expression of e-NOS level and increased of aortic IMT. Linear regression model  
49 found that eNOS level negatively correlated wiith aortic IMT ( $r^2 = 0.584$ ,  $\beta = -$   
50  $0.764$ ,  $p < 0.001$ ), whereas VCAM-1 expression did not correlate with aortic IMT  
51 ( $r^2 = 0.197$ ,  $p = 0.065$ ).

52

53 *Conclusion.* Low e-NOS level and high VCAM-1 level observed following after  
54 cigarette smoke exposure may increase aortic IMT.

55

56

57 **Keywords:** aortic tissue, atherosclerosis, cigarette smoking, endothelial-NOS,  
58 intima media thickness, VCAM-1

59

60

61 **Clinical significance:** Increasing evidence suggests that cigarette smoke  
62 exposure could induce VCAM-1 (enhance pro-atherogenic property),and  
63 decreased of e-NOS level (anti-atherogenic depletion). Thus, cigarette smoke  
64 may represent a significant risk factor for atherosclerosis by increasing aortic  
65 IMT. This evidence is discussed herein.

66

## 67 INTRODUCTION

68 Cigarette smoking is the most important modifiable risk factor for developing  
69 atherosclerosis including cerebrovascular accident, peripheral arterial disease  
70 and coronary heart disease<sup>1</sup>. In a meta-analysis from fifty-five eligible studies (43  
71 cross-sectional, 10 cohort and 2 case-control studies), the odds ratio (ORs) of  
72 peripheral arterial disease (PAD) associated with cigarette exposed was 2.71  
73 (95% CI: 2.28-3.21;  $p < 0.001$ )<sup>2</sup>. In a meta-analysis from 75 cohorts (2.4 million  
74 participants) that adjusted for cardiovascular risk factors other than coronary  
75 heart disease, multiple-adjusted pooled ORs of smoking versus non-smoking  
76 was 1.25 (95% CI: 1.12–1.39,  $p < 0.0001$ )<sup>3</sup>.

77 Even though epidemiologic studies clearly stated negative effect of cigarette  
78 smoking for cardiovascular diseases, the underlying mechanisms have yet to be  
79 confirmed. The pathogenesis and pathophysiologic mechanisms by which  
80 exposure to cigarette smoke could accelerate atherosclerosis cardiovascular  
81 disease are complex and challenging, due to more than 5000 different mixture  
82 chemicals inside the cigarette smoke itself<sup>4</sup>. Several potential contributing factors  
83 to atherogenesis inside the cigarette smoke are (1) polycyclic aromatic  
84 hydrocarbons, (2) oxidizing agents, (3) particulate matter, and (4) nicotine<sup>5</sup>.

85 One of the most important factor contributing for pro-atherogenic is nicotine,  
86 which has commonly been studied using cigarette smoke condensates<sup>6</sup>. In  
87 addition to its role as the habituating agent in tobacco, nicotine also accelerates  
88 atherosclerosis cardiovascular disease. There are several potential mechanisms

89 of the pro-atherogenic effects of nicotine: (1) inducing endothelial dysfunction, (2)  
90 modifying lipid profile, (3) increasing inflammatory response, (4) inducing the  
91 release of catecholamines, which may increase heart rate and blood pressure,  
92 (5) increases platelet aggregability, (6) direct actions on the cellular elements  
93 participating in plaque formation, and (7) induces the proliferation and migration  
94 of vascular smooth muscle cells into the intima, mediated in part by TGF $\beta$  <sup>7</sup>.  
95 These pathomechanisms of nicotine could lead to the increases of intima media  
96 thickness of the entire blood vessel, leading to the greater risk of developing  
97 atherosclerosis<sup>8</sup>.

98 To learn deeper about the pathomechanisms of the diseased endothelium, we  
99 need to study all the oxidizing, inflammatory, and thrombotic molecules which are  
100 not in equilibrium state. In the model of atherosclerosis cardiovascular diseases,  
101 a pathological imbalance between prothrombotic and antithrombotic state,  
102 prooxidant and antioxidant state, pro-inflammatory and anti-inflammatory state  
103 are observed<sup>9</sup>. Considerable evidence supports the importance of inflammation  
104 and hypercoagulability to promote atherogenic state<sup>10</sup>. There is abundant  
105 literature concerning the role of biomarkers of pathological imbalance in  
106 atherosclerosis.

107 Cell adhesion molecules are the essential pro-inflammatory and pro-atherogenic  
108 proteins that represent a hallmark of endothelial dysfunction and atherosclerosis.  
109 P-selectin, vascular cell adhesion molecule (VCAM)-1, intercellular adhesion  
110 molecule (ICAM)-1, and PECAM-1 were demonstrated to be involved in the  
111 formation of atherosclerosis plaque<sup>11</sup>. Beyond the others cell adhesion

112 molecules, VCAM-1 plays as an important factor in neointima proliferation  
113 following nicotine-induced arterial injury, an area of research important for  
114 atherosclerosis cardiovascular diseases<sup>12</sup>. In the nicotine-induced arterial injury  
115 model, VCAM-1 expression is highly induced in the proliferation and migration of  
116 neointimal smooth muscle cells<sup>13</sup>.

117 Previous studies showed that upregulation of endothelial nitric oxide synthase (e-  
118 NOS) expression and activity has its important role in the protection of  
119 endothelium<sup>14–16</sup>. e-NOS could stimulate endothelium-dependent relaxation and  
120 protect against development VCAM-1-induced endothelial dysfunction<sup>17</sup>.  
121 However, to our knowledge, little is known about the role of cigarette smoking in  
122 this atherosclerotic inflammatory process. This study aims to explore the link  
123 between cigarette smoking on e-NOS and VCAM-1, which results to the  
124 development of aortic intima media thickness (IMT) of the experimental animals.

125

## 126 MATERIAL AND METHODS

127

### 128 ***Ethics approval***

129 Animal experimental study were conducted under the approval of the  
130 Institutional Animal Care and Use Committee of Universitas Airlangga (UNAIR),  
131 Surabaya, Indonesia (animal approval no: 2.KE.184.10.2019) under the name  
132 of Meity Ardiana as the Principal Investigator. Study was carried out in strict  
133 accordance to internationally-accepted standards of the Guide for the Care and  
134 Use of Laboratory Animals of the National Institute of Health.

135

### 136 ***Animals***

137 The present study used 18 male Wistar rats (*Rattus norvegicus*), eight weeks  
138 of age (average body weight 150-200 grams). The rats were housed in  
139 microisolator cages and maintained in a constant room temperature ranging  
140 from 22°C to 25°C, with a 12-h light/12-h dark cycle, under artificially controlled  
141 ventilation, with a relative humidity ranging from 50% to 60%. The rats were fed  
142 a standard balanced rodent diet and water were provided ad libitum.

143

### 144 ***Experimental design and groups***

145 The present study design was a randomized post-test only controlled group  
146 design using quantitative method. We extracted 18 male Wistar rats,  
147 randomized and then allocated them into 2 groups. Group 1 were given no  
148 exposed to tobacco smoke, whilst group 2 were given 40 cigarette smokes

149 daily for 28 days as seen in **Figure 1**. Each cigarette smoke contains 39 mg of  
150 tar and 2.3 mg of nicotine The enrolled subjects were analyzed for vascular cell  
151 adhesion molecule 1 (VCAM-1), endothelial nitric oxide synthase (e-NOS), and  
152 aortic intima media thickness (IMT) after 28 days of consecutive experiments.

153

154

### 155 ***Aortic Intima Media Thickness (IMT)***

156 Thoracic aortas were prepared as distal aortic arch by cutting from left  
157 ventricle. The post mortem samples of descending thoracic aortas obtained by  
158 dissection were fixed in 10% formaldehyde, embedded in paraffin, and  
159 sectioned at a thickness of 6  $\mu\text{m}$ . The mounted tissues were stained using  
160 hematoxylin and eosin. Aortic intima media thickness was measured via Leica  
161 DMD 108 (Leica Microsystems GmbH, Wetzlar, Germany). Each sample was  
162 measured blindly as “micrometer ( $\mu\text{m}$ )” from six different locations of the vessel  
163 wall. Arithmetic averages of these six measurements were presented in the  
164 results section.

165

### 166 ***Vascular cell adhesion molecule 1 (VCAM-1)***

167 We used streptavidin-biotin method uses a biotin conjugated secondary  
168 antibody to link the primary antibody to a streptavidin-peroxidase complex for  
169 Immunohistochemistry (IHC) staining. The labeled streptavidin-biotin (LSAB)  
170 method were utilized to measure expression of VCAM-1 in the aortic tissue of  
171 the rats. Firstly, aortic tissue were prepared and preserved through

172 deparaffinize models following fixation. Secondly, aortic tissue were rehydrated  
173 by immersing the slides through the xylene (three washes 5 minutes each),  
174 100% ethanol (two washes 10 minutes each), 95% ethanol (two washes 10  
175 minutes each), 70% ethanol (two washes 10 minutes each), 50% ethanol (two  
176 washes 10 minutes each), and deionized water (two washes for 5 minutes).  
177 Thirdly, aortic tissue were washed using Phospat Buffer Sollution and then,  
178 dipped into 3% of H<sub>2</sub>O<sub>2</sub> solution withing 20 minutes. Fourthly, we added 1% of  
179 Bovine Serum Albumin to the Phospat Buffer Sollution and then incubated  
180 them within 30 minutes in the room temperature. Fifthly, primary antibody anti-  
181 VCAM-1 (Santacruz biotech SC-13160) were added and incubated within 30  
182 minutes, then washed again using Phospat Buffer Sollution. Secondary  
183 antibody (Anti-Rat IgG Biotin Labelled) were added and incubated within 30  
184 minutes in the room temperature, then washed using Phospat Buffer Sollution.  
185 Sixthly, SA-HRP (Strepaavidin-Hoseradish Peroxidase) complex were added and  
186 incubated within 10 minutes in the room temperature and then, washed using  
187 Phospat Buffer Sollution. Seventhly, Chromogen DAB (3,3-diaminobenzidine  
188 tetrahydrochloride) were added and incubated within 10 minutes in the room  
189 temperature and then, washed using Phospat Buffer Sollution and sterile  
190 water. Finally, counterstain Hematoxylin-Eosin were added into the object  
191 glasses and expression of VCAM-1 were measured and analyzed by a  
192 biological microscope (400x magnification) from tunica intima and tunica media  
193 of the aortic tissue. Semiquantitative measurements of VCAM-1 were done by  
194 immunoreactivity scoring system (**Table 1**).



195

196 ***Endothelial Nitric Oxide Synthase (e-NOS)***

197 All samples were assessed by direct-sandwich enzyme-linked immunosorbent  
198 assay (ELISA) under the manufacturer's (R&D System Europe Ltd, Abingdon,  
199 UK) according to the National Institute for Biological Standards and Controls  
200 (Blanche Lane, South Mimms, Potters Bars, Hertfordshire, UK) protocol. We  
201 used eNOS kit from the elabscience (catalogue number: E-EL-R0367). Briefly,  
202 samples from the aortic tissue were collected and stored at -70°C (-94°F) at  
203 Institute of Tropical Diseases Universitas Airlangga (UNAIR). Samples were  
204 homogenized into solution. Then, 100 µL of the solution were mixed with the  
205 well-coated primary antibody for e-NOS. Overnight incubation were done in the  
206 temperature 4°C with shaking machine. Wash Buffer (20x) were diluted to 1x  
207 working solution with D.I. water prior to ELISA wash procedures. After that, 50  
208 µL of the stop solution were added into each samples. A minimum value of 0.01  
209 pg/mL were assigned for below the limit of detection.

210

211 ***Statistical analysis***

212 All measurements were performed and replicated at least three times. Results  
213 were presented as (1) means  $\pm$  standard deviations (SD) for normally  
214 distributed data; (2) medians with lower and upper value for abnormally  
215 distributed data. The assumption of the normality for the complete data was  
216 assessed by Shapiro-Wilk test. Test of homogeneity of variances was  
217 assessed by Levene Statistics. Statistical significance were examined by

218 Independent T-test, Mann-Whitney U test, and logistic regression using SPSS  
219 version 17.0 for Microsoft (IBM corp, Chicago, USA).  
220

## 221 RESULTS

### 222 ***Comparison of IMT level between smoke and non-smoke groups***

223 After 28 days following experiments, there was a significance difference of IMT  
224 level between both groups ( $p<0.001$ ). Mean of the aortic IMT in all subjects  
225 were  $73.68\pm 17.86$   $\mu\text{m}$ . Mean of the aortic IMT in cigarette smoke groups were  
226  $88.39\pm 2.51$   $\mu\text{m}$ . Mean of the aortic IMT in control group were  $58.98\pm 13.61$   $\mu\text{m}$ .  
227 **Table 2** presents the impact of the exposure of daily 40 cigarette smokes on the  
228 aortic IMT profile of the experimental animals. The comparative analysis of IMT  
229 parameters demonstrated that there were a statistically significant differences  
230 between the groups ( $p<0.001$ ; Mann-Whitney's test). (**Figure 2**)

231

### 232 ***Comparison of e-NOS level between smoke and non-smoke groups***

233 After 28 days following experiments, there was a significance difference of e-  
234 NOS level between both groups ( $p<0.001$ ). Mean of the e-NOS in all subjects  
235 were  $78.02\pm 25.84$   $\text{pg/ml}$ . Mean of the e-NOS level in cigarette smoke groups  
236 were  $101.22\pm 11.8$   $\text{pg/ml}$ . Mean of the e-NOS level in control group were  
237  $54.83\pm 8.3$   $\text{pg/ml}$ . **Table 3** presents the impact of the exposure of daily 40  
238 cigarette smokes on the e-NOS profile of the experimental animals. The  
239 comparative analysis of e-NOS parameters demonstrated that there were a  
240 statistically significant differences between the groups ( $p<0.001$ ; Mann-  
241 Whitney's test). (**Figure 3**)

242

### 243 ***Comparison of VCAM-1 expression between smoke and non-smoke***

244 After 28 days following experiments, mean of the VCAM-1 expression in all  
245 subjects were  $9.00 \pm 3.51$ . Mean of the VCAM-1 level in cigarette smoke groups  
246 were  $10.33 \pm 2.9$ . Mean of the VCAM-1 level in control group were  $7.67 \pm 3.7$ .  
247 **Table 4** presents the impact of the exposure of daily 40 cigarette smokes on the  
248 VCAM-1 expression of the experimental animals. The comparative analysis of  
249 VCAM-1 expression demonstrated that there were no statistically significant  
250 differences between the groups ( $p=0.112$ ; independent t test). (**Figure 4**)

#### 251 ***Correlation of e-NOS level and aortic IMT***

252 To determine if level of e-NOS is correlated with atherosclerosis, we measured  
253 e-NOS as a parameter of endothelial cell function in aortic tissue of Wistar rats.  
254 Linear regression model found that e-NOS was negatively correlate with aortic  
255 IMT in our experimental study ( $r^2 = 0.584$ ,  $\beta = -0.764$ ,  $p < 0.001$ ). (**Figure 5**)

256

#### 257 ***Correlation of VCAM-1 expression and aortic IMT***

258 To determine if expression of VCAM-1 precedes atherosclerosis, we measured  
259 expression of this adhesion molecule in aortic tissue of Wistar rats. Linear  
260 regression model found that VCAM-1 expression did not correlate with aortic  
261 IMT ( $r^2 = 0.197$ ,  $p = 0.065$ ). (**Figure 6**)

262

263 **DISCUSSION**

264 ***Oxidative stress-mediated cigarette smokes precedes atherosclerosis***

265 Cigarette smoking is one of the well-established modifiable risk factor for  
266 developing atherosclerosis, which mechanisms remain closely linked to the  
267 increased oxidative stress. Total amount of cigarettes smoked per day plays an  
268 essential role in increasing the level of oxidative stress and depletion of the  
269 antioxidant system. Cigarette smoke contains great concentrations of reactive  
270 oxygen species and tiny particles that are easily inhaled in human body<sup>18</sup>. It is  
271 believed that smoking causes increased oxidative stress because of several  
272 mechanisms, including direct damage by radical species and the inflammatory  
273 response caused by cigarette smoking. The production of oxidative stress and  
274 reactive oxygene species due to the cigarette smoke is expected to increase  
275 VCAM-1 expression and decrease of e-NOS level. According to the previous  
276 research by Yang et al (2014), an increase of VCAM-1 expression in rat arteries  
277 after being exposed to cigarette smoke had been observed for 7 days<sup>19</sup>. In a  
278 translational research did by Teasdale et al (2014) and Pott et al (2017) also  
279 supported that increased oxidative stress, reactive oxygene species, and VCAM-  
280 1 expression in endothelial cell cultures following exposed to cigarette smokes<sup>20</sup>.  
281 Previously, researchers had been studying the influence of smoking on the levels  
282 of several biomarkers of oxidative stress, antioxidant status and redox status,  
283 including plasma hydroperoxides, e-NOS and VCAM-1. Using different assays to

284 our study, they confirmed that smokers have elevated concentrations of VCAM-1  
285 and compromised e-NOS status<sup>21</sup>.

286 ***Cigarette smoke extract induces expression of cell adhesion molecules***

287 VCAM-1 is expressed in vascular endothelial cells, and expression of VCAM-1  
288 may promote the adhesion of leukocytes to the endothelial cells. VCAM-1  
289 accelerates the migration of adherent leukocytes along the endothelial surface,  
290 and promotes the proliferation of vascular smooth muscle cells; thus, VCAM-1  
291 may play an essential role as a pro-atherogenic molecules<sup>22</sup>. Exposure to  
292 cigarette smoke in this study can increase VCAM-1 expression in the aorta  
293 although the increase is not statistically significant between the two groups. An  
294 insignificant increase in VCAM-1 expression was also found in the previous  
295 human research held by Noguchi (1999). In his previous research, soluble  
296 VCAM-1 levels were increased in smokers' serum but not significantly when  
297 compared to non-smokers' serum<sup>23</sup>.

298 Increased of VCAM-1 expression is a multifactorial process, smoking could not  
299 increase VCAM-1 independently without other risk factors such as dyslipidemia.  
300 Mu *et al* (2015) had proven this hypothesis by examining VCAM-1 expression in  
301 aortic tissue of dyslipidemia patients. As a result, VCAM-1 expression was  
302 positively correlated with triglyceride, total cholesterol and LDL levels while  
303 VCAM-1 and HDL had a negative correlation<sup>24</sup>. Because the expression of  
304 VCAM-1 in endothelial cells requires a trigger that is high lipid levels, especially  
305 LDL. An increase in oxidized LDL in the endothelium will be phagocytosed by

306 macrophages. Recruitment of these macrophages requires the role of VCAM-1<sup>25</sup>.  
307 In our study, other factors contributing to the development of atherosclerosis  
308 such as dyslipidemia weren't included. Our study did not use experimental  
309 animals with high-fat diets and serial lipid profile measurement Therefore, results  
310 of our study didn't show any statistical significance of VCAM-1 expression  
311 between K (-) and K (+) groups.

312 ***Cigarette smoke extract counteracts atheroprotective effects of endothelial***  
313 ***nitric oxide synthase***

314 Decreased bioavailability of NO is a central mechanism in the pathophysiology of  
315 endothelial dysfunction. Endothelial nitric oxide synthetase (e-NOS) is an  
316 enzyme that resposable to produce NO in endothelial cells, so the level of eNOS  
317 can represent the availability of NO in endothelial cells<sup>26</sup>. Endothelial-cell  
318 dysfunction itself could be tested by acetylcholine response function and  
319 adenosine coronary flow reserve tests<sup>27</sup>. Celermajer *et al* (1992) published a  
320 study showing that smoking reduces flow-mediated dilatation (FMD) in systemic  
321 arteries in healthy young adults<sup>28</sup>.

322 Our study showed that exposure to cigarette smoke can reduce levels of eNOS  
323 in the aorta. Our results are consistent with the findings of Su *et al* and He *et al*.  
324 which shows a significant decrease of eNOS level in endothelial cell cultures  
325 exposed to cigarette smoke. He *et al* (2017) showed that exposure to cigarette  
326 smoke in endothelial cell culture can reduce the expression of eNOS genes and  
327 proteins, resulting endothelial-cell dysfunction<sup>29</sup>. On the other hand, Su *et al*

328 (1998) had already proven that administration of cigarette smoke extract can  
329 reduce the expression of genes and proteins eNOS. The effect of eNOS  
330 reduction depends on the duration of exposure to the cells. The longer duration  
331 of cigarette smoke exposure, eNOS levels will be decreased<sup>30</sup>. In addition to  
332 decreasing eNOS at the gene level, Pini *et al* (2016) showed that exposure to  
333 secondhand smoke had also been shown to reduce eNOS at protein levels.  
334 eNOS levels decreased in the aorta of guinea pigs after exposed to cigarettes for  
335 8 weeks<sup>31</sup>.

336 It has been demonstrated that cigarette smoking triggers demethylation, leading  
337 to a consecutive reactivation of epigenetically silenced genes in vitro and in vivo  
338 of eNOS and NO production<sup>32</sup>. Peroxynitrites, a very reactive oxygen species  
339 and pro-oxidant properties from cigarette extract, is believed to promote  
340 demethylation and inactivation of e-NOS<sup>33</sup>. In addition, peroxynitrite and other  
341 free radicals can deactivate BH4 which is an important cofactor in eNOS  
342 production. This was explained by the research of Abdelghany *et al* (2018) which  
343 showed that exposure to cigarette smoke has been shown to reduce the BH4  
344 cofactor and correlated with the amount of superoxide and NO production in  
345 endothelial cell cultures<sup>34</sup>. A decrease of e-NOS and NO level will increase  
346 vascular tone, increase expression of adhesion molecules, and trigger  
347 coagulation cascade and inflammation<sup>35</sup>.

348 ***In the final pathway, cigarette smoking leads to increase of aortic intima-***  
349 ***medial thickness as an earlier sign of atherosclerosis***



350 Based on these literatures and our own data, we suggest that the exposure to  
351 cigarette smoking for 28 days daily might be an independent risk factor for  
352 atherogenic process through several mechanisms. Aortic IMT in this study  
353 increased in group K (+) as was also found in studies conducted by Ali *et al*  
354 (2012)<sup>36</sup>. Increased aortic and entire blood vessels' IMT are due to the  
355 pathological conditions such as apoptosis and excessive proliferation as a  
356 compensation mechanism<sup>37</sup>. In the previous study, increased of IMT is the  
357 complication of endothelial dysfunction leads to the atherosclerosis process<sup>38</sup>.  
358 Cigarette smoking exposure underlies the endothelial dysfunction by reduction of  
359 e-NOS level and increased of VCAM-1 expression<sup>39</sup>.

360 Exposure to cigarette smoke also affects the histological structure of the aorta. In  
361 this study, we found not only an increased of IMT, but also structural changes  
362 marked by disorganization and vacuolization of smooth muscle cells in tunica  
363 media of the aortic tissue. On the contrary, no changes were observed at the  
364 tunica intima. Exposure to cigarette smoke for 28 days in the study of Ali *et al*  
365 (2012) also found the same results: no changes at the tunica intima were  
366 observed from the experimental rat<sup>36</sup>. Another experimental study from Jaldin *et*  
367 *al* (2013) found that exposed to cigarette smoke for 8 weeks, only made a  
368 disorganization in vascular smooth muscle cells in tunica media<sup>40</sup>. Vacuolization  
369 is one of the complications from cytotoxic processes in the cells and earlier  
370 marker of preclinical atherosclerosis. Chemical components from the cigarette  
371 smokes can cause oxidative stress which is characterized by permanent  
372 vacuolization in cells. In the microscopic phenotyping, vacuolization makes

373 vascular smooth muscle cells have different shapes and sizes, thus making cells  
374 become disorganized and lead to atherosclerosis<sup>41</sup>.

375

### 376 ***Limitations and Strength***

377 Every study has its limitations which emerge during the realization of the study,  
378 creates challenges and thus, should be highlighted. First, this study had  
379 limitations with regard to small number of samples which can increase the  
380 likelihood of error and imprecision. Second, results from animal model often do  
381 not translate into replications in human model. Level of e-NOS and VCAM-1  
382 expression in Wistar rats are typically transient, whereas in human persists for  
383 many years. Other crucial difference is IMT, which is usually much lower in the  
384 Wistar rats than human. These factors may have an impact on the interpretation  
385 of our results. Thus, the findings should be interpreted within the context of this  
386 study and its limitations. The strengths of the study were its high statistical power  
387 and the homogeneity of each group to enable comparison between groups and  
388 periods.

### 389 ***Conclusion***

390 The present study indicates that, cigarette smoking adversely affects endothelial  
391 function and increases risk of atherosclerosis. Cigarette smoking as a risk factor  
392 for atherosclerosis is closely linked to the increased inflammatory process on the  
393 vascular endothelium. Low e-NOS level and high VCAM-1 level observed  
394 following smoke exposure may increase aortic IMT. Furthermore, smoking has

395 also been found to influence the aortic IMT. Aortic IMT itself reflects the level of  
396 established CVD risk factors in apparently healthy men and women, adding to  
397 the evidence that cigarette smoking contributes to CVD through their  
398 inflammatory effects on the vascular endothelium.

399

400 **ACKNOWLEDGMENTS**

401 The authors would like to acknowledge Hari Basuki Notobroto from Public Health  
402 Department Universitas Airlangga whose statistical expertise was invaluable  
403 during the analysis. The authors, hereby, acknowledge the above authorities and  
404 all staff, fellows, residents and laboratory assistants from Department of  
405 Cardiology and Vascular Medicine, Faculty of Medicine Universitas Airlangga,  
406 who are willing to help in the technical aspect.

407

408 **CONFLICT OF INTEREST**

409 All authors confirm that there are no conflicts of interest.

410 **AUTHOR CONTRIBUTIONS**

411 Conceptualization: Ardiana M.

412 Project administration and funding acquisition: Ardiana M, Hermawan HO.

413 Data curation and formal analysis: Nugraha RA.

414 Investigation: Ardiana M, Hermawan HO.

415 Methodology: Ardiana M, Hermawan HO.

416 Resources and Software: Pikir BS, Santoso A.

417 Supervision and validation: Pikir BS, Santoso A.

418 Writing - original draft: Nugraha RA.

419 Writing - review & editing: Pikir BS, Santoso A

420

421 **AVAILABILITY OF DATA AND MATERIALS**

422 The data that support the findings of this study are available from the

423 corresponding author, upon reasonable request.

424

425 **CONSENT FOR PUBLICATIONS**

426 Not applicable (public data).

427

428 **REFERENCES**

- 429 1. Zhu J, Nelson K, Toth J, Muscat JE. Nicotine dependence as an  
430 independent risk factor for atherosclerosis in the National Lung Screening  
431 Trial. *BMC Public Health*. 2019;19(1):1-6. doi:10.1186/s12889-019-6419-8
- 432 2. Lu L, F Mackay D, Pell JP. Meta-analysis of the association between  
433 cigarette smoking and peripheral arterial disease. *Heart*. 2014;100(5):414-  
434 423. doi:10.1136/heartjnl-2013-304082
- 435 3. Huxley RR, Woodward M. Cigarette smoking as a risk factor for coronary  
436 heart disease in women compared with men: A systematic review and  
437 meta-analysis of prospective cohort studies. *Lancet*. 2011;378(9799):1297-  
438 1305. doi:10.1016/S0140-6736(11)60781-2
- 439 4. Préfontaine D, Morin A, Jumarie C, Porter A. In vitro bioactivity of  
440 combustion products from 12 tobacco constituents. *Food Chem Toxicol*.  
441 2006;44(5):724-738. doi:10.1016/j.fct.2005.10.005
- 442 5. Wang T, Jiang CQ, Xu L, et al. The mediating role of inflammation in the  
443 association between cigarette smoking and intima-media thickness: The  
444 Guangzhou biobank cohort study. *Med (United States)*. 2020;99(8).  
445 doi:10.1097/MD.00000000000019207
- 446 6. Harris JE. Cigarette smoke somponents and disease: Cigarette smoke is  
447 More than a triad of tar, nicotine and carbon monoxide. *Smok Tob Control*  
448 *Monogr No 7*. 1991:59-75.

- 449 7. Lee J, Cooke JP. The role of nicotine in atherosclerosis. *Atherosclerosis*.  
450 2011;215(2):281-283. doi:10.1016/j.atherosclerosis.2011.01.003.The
- 451 8. Flouris AD, Poulianiti KP, Chorti MS, et al. Acute effects of electronic and  
452 tobacco cigarette smoking on complete blood count. *Food Chem Toxicol*.  
453 2012;50(10):3600-3603. doi:10.1016/j.fct.2012.07.025
- 454 9. Manduteanu I, Simionescu M. Inflammation in atherosclerosis: A cause or  
455 a result of vascular disorders? *J Cell Mol Med*. 2012;16(9):1978-1990.  
456 doi:10.1111/j.1582-4934.2012.01552.x
- 457 10. Ambrose JA, Bhullar AS. Inflammation and Thrombosis in Coronary  
458 Atherosclerosis : Pathophysiologic Mechanisms and Clinical Correlations.  
459 *Eur Med J*. 2019;(March):71-78.
- 460 11. Galkina E, Ley K. Vascular adhesion molecules in atherosclerosis.  
461 *Arterioscler Thromb Vasc Biol*. 2007;27(11):2292-2301.  
462 doi:10.1161/ATVBAHA.107.149179
- 463 12. Dos Santos JC, Cruz MS, Bortolin RH, et al. Relationship between  
464 circulating VCAM-1, ICAM-1, E-selectin and MMP9 and the extent of  
465 coronary lesions. *Clinics*. 2018;73(4):1-5. doi:10.6061/clinics/2018/e203
- 466 13. Ley K, Huo Y. JCI0113005.v1. 2001;(10):1-2.
- 467 14. Toporsian M, Gros R, Kabir MG, et al. A role for endoglin in coupling eNOS  
468 activity and regulating vascular tone revealed in hereditary hemorrhagic

- 469 telangiectasia. *Circ Res.* 2005;96(6):684-692.  
470 doi:10.1161/01.RES.0000159936.38601.22
- 471 15. Jerkic M, Rivas-Elena J V., Santibanez JF, et al. Endoglin regulates  
472 cyclooxygenase-2 expression and activity. *Circ Res.* 2006;99(3):248-256.  
473 doi:10.1161/01.RES.0000236755.98627.69
- 474 16. Jerkic M, Rodríguez-Barbero A, Prieto M, et al. Reduced angiogenic  
475 responses in adult endoglin heterozygous mice. *Cardiovasc Res.*  
476 2006;69(4):845-854. doi:10.1016/j.cardiores.2005.11.020
- 477 17. Rathouska J, Nemeckova I, Zemankova L, et al. Cell adhesion molecules  
478 and eNOS expression in aorta of normocholesterolemic mice with different  
479 predispositions to atherosclerosis. *Heart Vessels.* 2015;30(2):241-248.  
480 doi:10.1007/s00380-014-0493-8
- 481 18. Kamceva G, Arsova-Sarafinovska Z, Ruskovska T, Zdravkovska M,  
482 Kamceva-Panova L, Stikova E. Cigarette smoking and oxidative stress in  
483 patients with coronary artery disease. *Maced J Med Sci.* 2016;4(4):636-  
484 640. doi:10.3889/oamjms.2016.117
- 485 19. Yang GH, Li YC, Wang ZQ, et al. Protective effect of melatonin on  
486 cigarette smoke-induced restenosis in rat carotid arteries after balloon  
487 injury. *J Pineal Res.* 2014;57(4):451-458. doi:10.1111/jpi.12185
- 488 20. Teasdale JE, Hazell G, Newby AC, White SJ. Paradoxical effects of  
489 cigarette smoke extract and high laminar flow on tumour necrosis factor-



- 490 alpha induced VCAM-1 up-regulation – Implications for endothelial  
491 dysfunction. *Atherosclerosis*. 2014;237(2):e13-e14.  
492 doi:10.1016/j.atherosclerosis.2014.10.074
- 493 21. Pott GB, Ph D, Tsurudome M, Bui J, Marc L. 1,2, \*. 2017;5(7):1-15.
- 494 22. Petersen EJ, Miyoshi T, Yuan Z, et al. siRNA silencing reveals role of  
495 vascular cell adhesion molecule-1 in vascular smooth muscle cell  
496 migration. *Atherosclerosis*. 2008;198(2):301-306.  
497 doi:10.1016/j.atherosclerosis.2007.10.015
- 498 23. Noguchi T. Soluble intercellular adhesion molecule-1 and vascular cell  
499 adhesion molecule-1 concentrations, and leukocyte count in smokers.  
500 *Environ Health Prev Med*. 1999;4(2):71-74. doi:10.1007/BF02931997
- 501 24. Mu W, Chen M, Gong Z, Zheng F, Xing Q. Expression of vascular cell  
502 adhesion molecule-1 in the aortic tissues of atherosclerotic patients and  
503 the associated clinical implications. *Exp Ther Med*. 2015;10(2):423-428.  
504 doi:10.3892/etm.2015.2540
- 505 25. Toma L, Sanda GM, Deleanu M, Stancu CS, Sima A V. Glycated LDL  
506 increase VCAM-1 expression and secretion in endothelial cells and  
507 promote monocyte adhesion through mechanisms involving endoplasmic  
508 reticulum stress. *Mol Cell Biochem*. 2016;417(1-2):169-179.  
509 doi:10.1007/s11010-016-2724-z
- 510 26. Messner B, Bernhard D. Smoking and cardiovascular disease:

- 511 Mechanisms of endothelial dysfunction and early atherogenesis.  
512 *Arterioscler Thromb Vasc Biol.* 2014;34(3):509-515.  
513 doi:10.1161/ATVBAHA.113.300156
- 514 27. Bruno RM, Gori T, Ghiadoni L. Endothelial function testing and  
515 cardiovascular disease: Focus on peripheral arterial tonometry. *Vasc*  
516 *Health Risk Manag.* 2014;10:577-584. doi:10.2147/VHRM.S44471
- 517 28. Celermajer DS, Sorensen KE, Gooch VM, et al. Non-invasive detection of  
518 endothelial dysfunction in children and adults at risk of atherosclerosis.  
519 *Lancet.* 1992;340(8828):1111-1115. doi:10.1016/0140-6736(92)93147-F
- 520 29. He Z, Chen Y, Hou C, He W, Chen P. Cigarette smoke extract changes  
521 expression of endothelial nitric oxide synthase (eNOS) and p16(INK4a)  
522 and is related to endothelial progenitor cell dysfunction. *Med Sci Monit.*  
523 2017;23:3224-3231. doi:10.12659/MSM.902746
- 524 30. Su Y, Han W, Giraldo C, De Li Y, Block ER. Effect of cigarette smoke  
525 extract on nitric oxide synthase in pulmonary artery endothelial cells. *Am J*  
526 *Respir Cell Mol Biol.* 1998;19(5):819-825. doi:10.1165/ajrcmb.19.5.3091
- 527 31. Pini A, Boccalini G, Baccari MC, et al. Protection from cigarette smoke-  
528 induced vascular injury by recombinant human relaxin-2 (serelaxin). *J Cell*  
529 *Mol Med.* 2016;20(5):891-902. doi:10.1111/jcmm.12802
- 530 32. Plimack ER, Kantarjian HM, Issa JP. Decitabine and its role in the  
531 treatment of hematopoietic malignancies. *Leuk Lymphoma.*

- 532 2007;48(8):1472-1481. doi:10.1080/10428190701471981
- 533 33. Incalza MA, D'Oria R, Natalicchio A, Perrini S, Laviola L, Giorgino F.  
534 Oxidative stress and reactive oxygen species in endothelial dysfunction  
535 associated with cardiovascular and metabolic diseases. *Vascul Pharmacol.*  
536 2018;100:1-19. doi:10.1016/j.vph.2017.05.005
- 537 34. Abdelghany TM, Ismail RS, Mansoor FA, Zweier JR, Lowe F, Zweier JL.  
538 Cigarette smoke constituents cause endothelial nitric oxide synthase  
539 dysfunction and uncoupling due to depletion of tetrahydrobiopterin with  
540 degradation of GTP cyclohydrolase. *Nitric Oxide - Biol Chem.* 2018;76:113-  
541 121. doi:10.1016/j.niox.2018.02.009
- 542 35. Kaur R, Kaur M, Singh J. Endothelial dysfunction and platelet hyperactivity  
543 in type 2 diabetes mellitus: Molecular insights and therapeutic strategies.  
544 *Cardiovasc Diabetol.* 2018;17(1):1-17. doi:10.1186/s12933-018-0763-3
- 545 36. Ali SS, Ayuob NN, Al Ansary AK, Soluman ER. Antioxidants protect against  
546 increased risk of atherosclerosis induced by exposure to cigarette smoke:  
547 Histological and biochemical study. *Saudi J Biol Sci.* 2012;19(3):291-301.  
548 doi:10.1016/j.sjbs.2012.03.002
- 549 37. Skilton MR, Celermajer DS, Cosmi E, et al. Natural History of  
550 Atherosclerosis and Abdominal Aortic Intima-Media Thickness: Rationale,  
551 Evidence, and Best Practice for Detection of Atherosclerosis in the Young.  
552 *J Clin Med.* 2019;8(8):1201. doi:10.3390/jcm8081201

- 553 38. Poredoš P. Endothelial dysfunction in the pathogenesis of atherosclerosis.  
554 *Clin Appl Thromb.* 2001;7(4):276-280. doi:10.1177/107602960100700404
- 555 39. Zhou J, Li YS, Nguyen P, et al. Regulation of vascular smooth muscle cell  
556 turnover by endothelial cell-secreted microRNA-126 role of shear stress.  
557 *Circ Res.* 2013;113(1):40-51. doi:10.1161/CIRCRESAHA.113.280883
- 558 40. Jaldin RG, Castardelli É, Perobelli JE, et al. Morphologic and  
559 biomechanical changes of thoracic and abdominal aorta in a rat model of  
560 cigarette smoke exposure. *Ann Vasc Surg.* 2013;27(6):791-800.  
561 doi:10.1016/j.avsg.2013.03.002
- 562 41. Harrington J, Peña AS, Gent R, Hirte C, Couper J. Aortic Intima Media  
563 Thickness is an Early Marker of Atherosclerosis in Children with Type 1  
564 Diabetes Mellitus. *J Pediatr.* 2010;156(2):237-241.  
565 doi:10.1016/j.jpeds.2009.08.036
- 566
- 567

568 **ABBREVIATIONS**

|     |                               |                                             |
|-----|-------------------------------|---------------------------------------------|
| 569 | ANOVA                         | analysis of variant                         |
| 570 | ELISA                         | enzyme-linked immunosorbent assay           |
| 571 | e-NOS                         | endothelial Nitric Oxide Synthase           |
| 572 | H <sub>2</sub> O <sub>2</sub> | Hydrogen peroxide                           |
| 573 | IACUC                         | Institutional Animal Care and Use Committee |
| 574 | IHC                           | Immunohistochemistry                        |
| 575 | IMT                           | Intima–media thickness                      |
| 576 | IRS                           | Immunoreactivity Scoring System             |
| 577 | LSAB                          | Labeled Streptavidin Avidin Biotin          |
| 578 | NIH                           | National Institutes of Health               |
| 579 | PCR                           | Polymerase Chain Reaction                   |
| 580 | SA-HRP                        | Streptavidin-Horse Radish Peroxidase        |
| 581 | SD                            | standard deviation                          |
| 582 | SEM                           | standard error of the mean                  |
| 583 | SPSS                          | Statistical Package for the Social Sciences |
| 584 | VCAM-1                        | Vascular Cell Adhesion Molecule-1           |

585

586 **TABLES**

587 **Table 1** – Immunoreactivity Scoring System (IRS)

| Score for percentage of cells staining | Score for intensity of staining    |
|----------------------------------------|------------------------------------|
| 0 = no stained cells                   | 0 = no reaction                    |
| 1 = <10% cells are stained             | 1 = mild intensity of staining     |
| 2 = 10-50% cells are stained           | 2 = moderate intensity of staining |
| 3 = 51-80% cells are stained           | 3 = heavy intensity of staining    |
| 4 = >80% cells are stained             |                                    |

588

589

590 **Table 2** – Statistic table IMT between K(+) group which is exposed to the daily

591 40 cigarette smokes and K(-) group as the control group.

**Group Statistics**

|     | Group | N | Mean    | Std. Deviation | Std. Error Mean | Sig (Independent T) | Sig (Mann-Whitney) |
|-----|-------|---|---------|----------------|-----------------|---------------------|--------------------|
| IMT | K(-)  | 9 | 58,9800 | 13,61075       | 4,53692         | <0.001              | <0.001             |
|     | K(+)  | 9 | 88,3911 | 2,51766        | ,83922          | <0.001              | <0.001             |

592

593

594 **Table 3** – Statistic table e-NOS between K(+) group which is exposed to the

595 cigarette smokes and K(-) group as the control group.

**Group Statistics**

|      | Group | N | Mean     | Std. Deviation | Std. Error Mean | Sig (Independent T) | Sig (Mann-Whitney) |
|------|-------|---|----------|----------------|-----------------|---------------------|--------------------|
| eNOS | K(-)  | 9 | 101,2233 | 11,80266       | 3,93422         | <0.001              | <0.001             |
|      | K(+)  | 9 | 54,8267  | 8,30862        | 2,76954         | <0.001              | <0.001             |

596

597 **Table 4** – Statistic table of VCAM-1 between K(+) group which is exposed to  
598 the cigarette smokes and K(-) group as the control group.

**Group Statistics**

|      |      | Group N | Mean  | Std. Deviation | Std. Error Mean | Sig (Independent T) | Sig (Mann-Whitney) |
|------|------|---------|-------|----------------|-----------------|---------------------|--------------------|
| VCAM | K(-) | 9       | 7,67  | 2,915          | ,972            | 0.111               | 0.138              |
| 1    | K(+) | 9       | 10,33 | 3,742          | 1,247           | 0.112               | 0.161              |

599

600

601 **FIGURE LEGENDS**

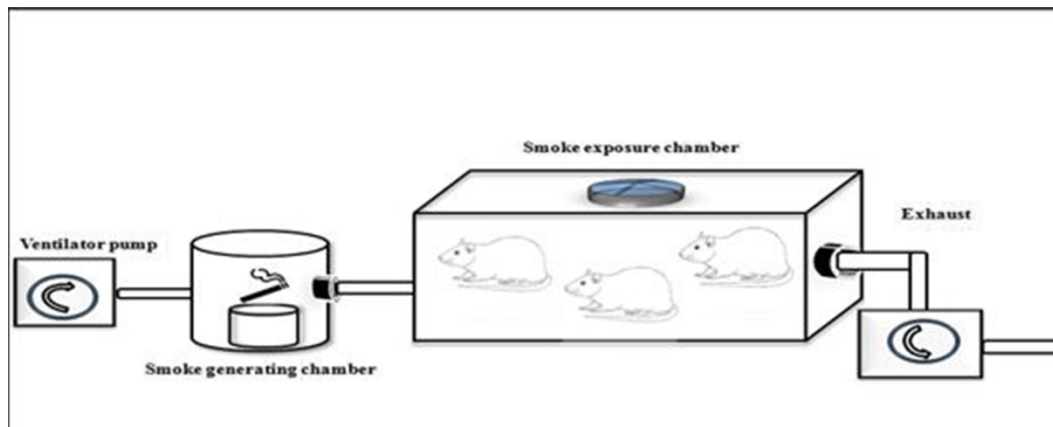

602

603 **Figure 1** – Illustration of how to exposed rats in the K(+) group to the cigarette  
604 smokes. Exposure to tobacco smokes were done using sidestream technique  
605 from peristaltic pump, smoke producer chamber, and inhalation chamber,  
606 connected by modified silicon tube.

607



608

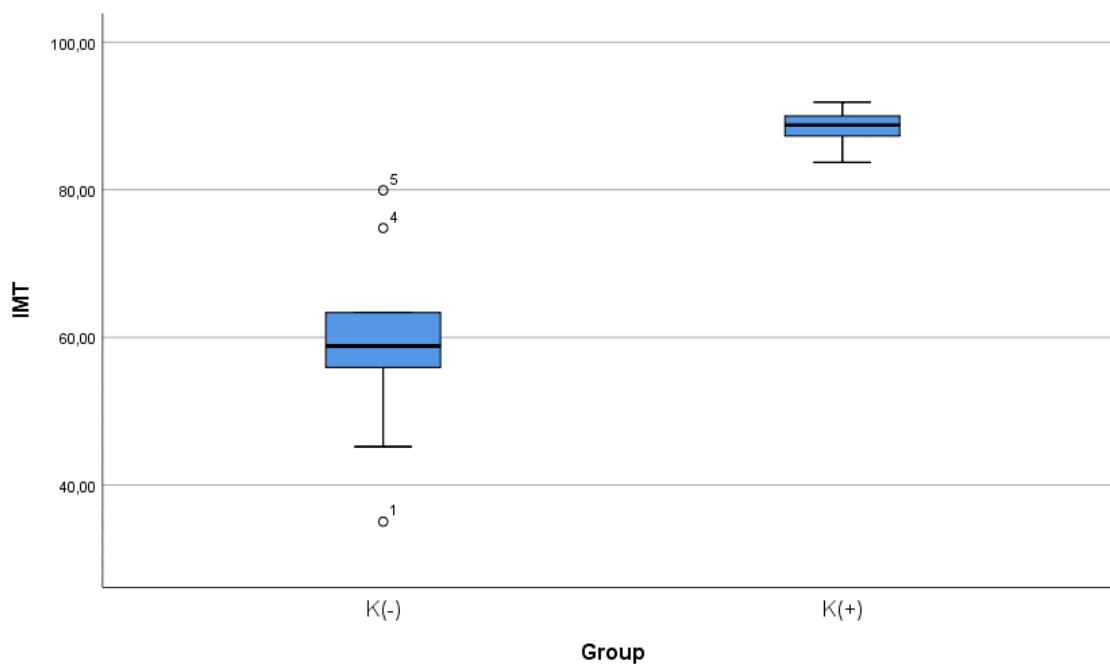

609

610 **Figure 2** – Median with lower and upper value of IMT between K(+) group which  
611 is exposed to the daily 40 cigarette smokes and K(-) group as the control group.

612

613

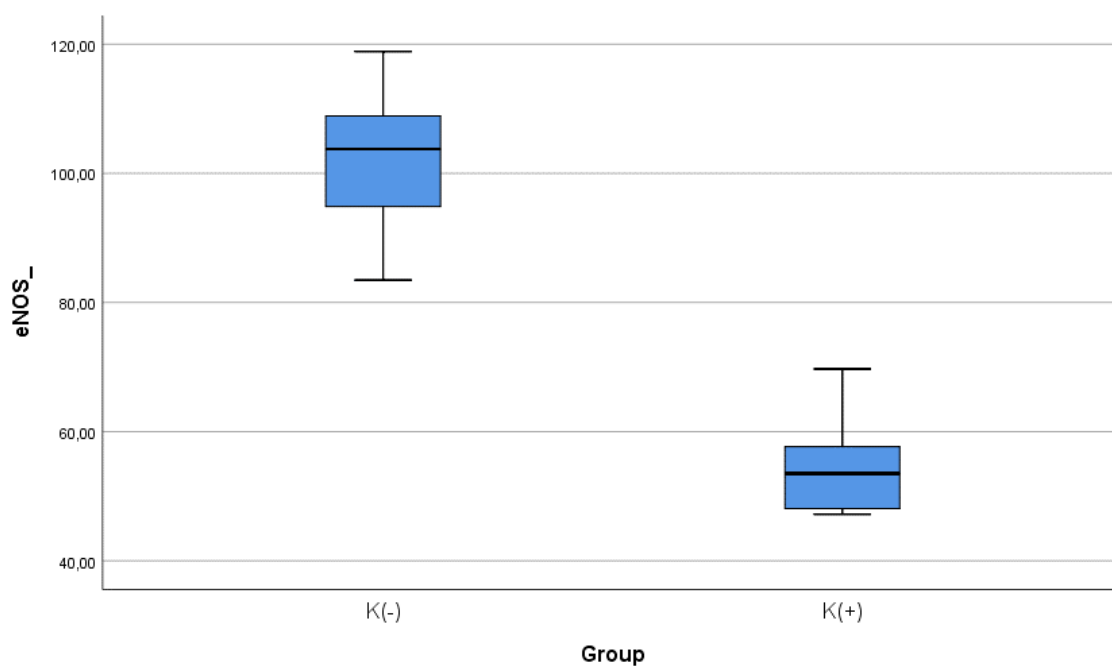

614

615 **Figure 3** – Median with lower and upper value of e-NOS between K(+) group  
616 which is exposed to the cigarette smokes and K(-) group as the control group.

617

618

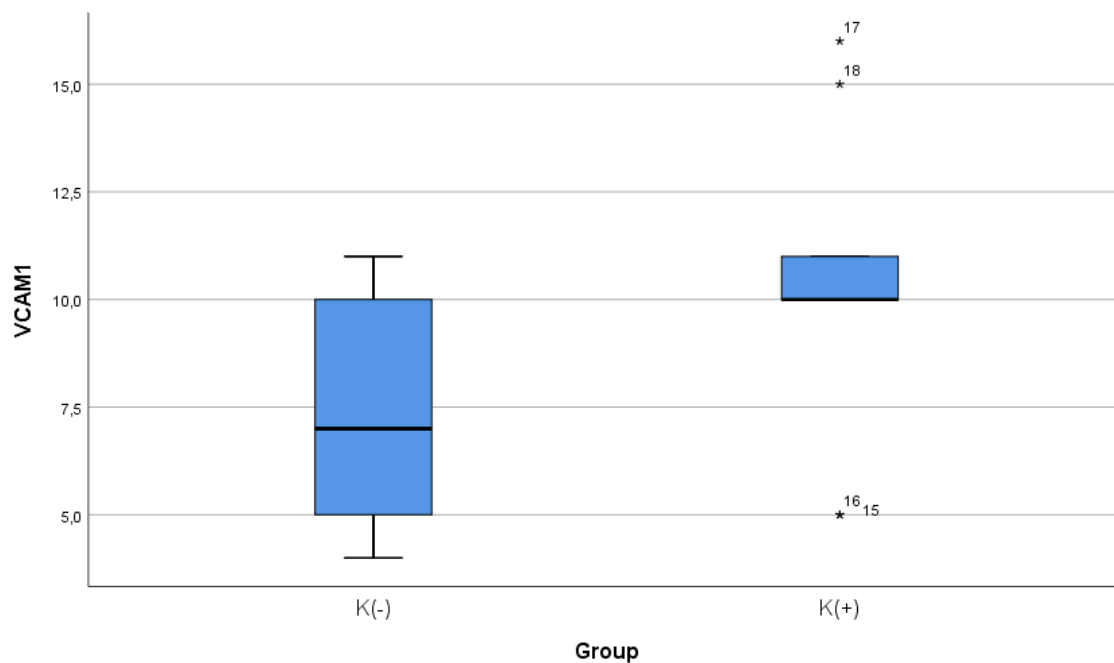

619

620 **Figure 4** – Median with lower and upper value of VCAM-1 between K(+) group  
621 which is exposed to the cigarette smokes and K(-) group as the control group.

622

623

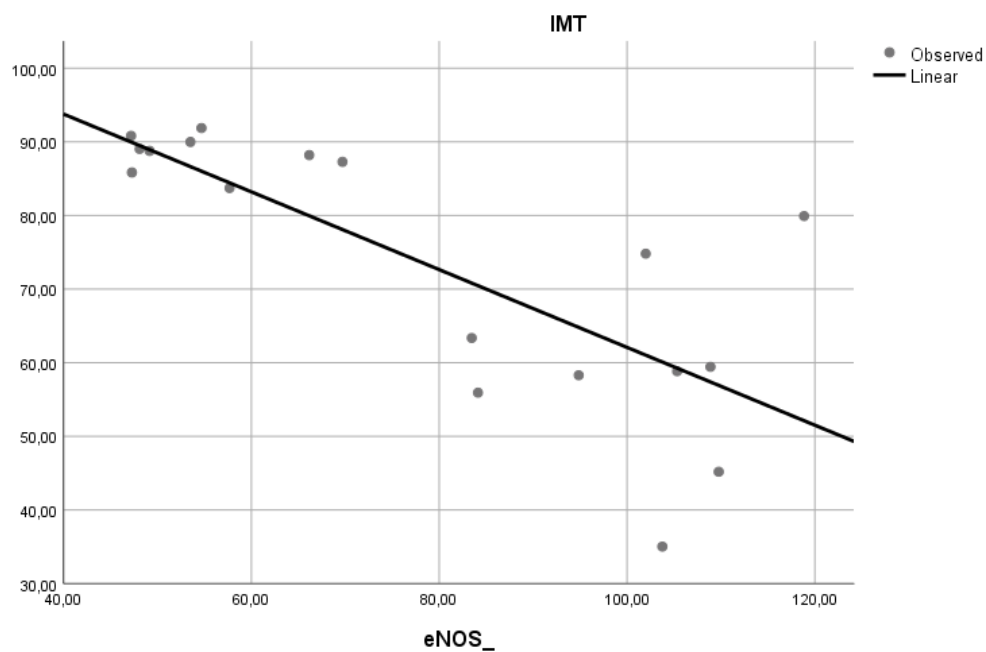

624

625 **Figure 5** – Relation between e-NOS level and aortic IMT in experimental rats. A

626 negative linear relationship was found between e-NOS level and aortic IMT.

627

628

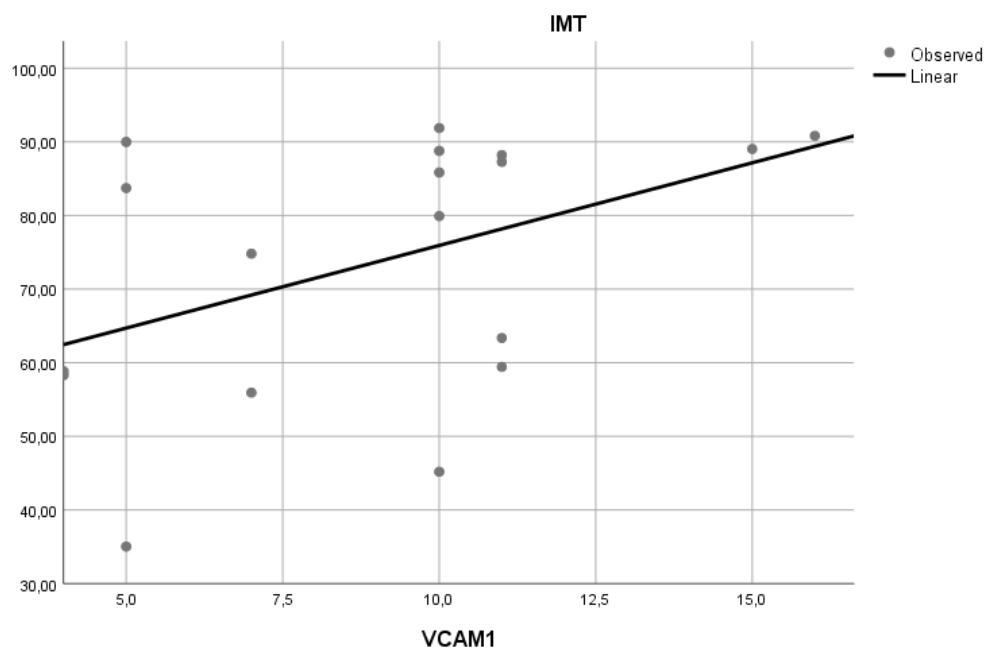

629

630 **Figure 6** – Relation between aortic VCAM-1 expression and aortic IMT in  
631 experimental rats. A positive but non-significant linear relationship was found  
632 between aortic VCAM-1 expression and aortic IMT.

633
